# Supplementary material for: Antioxidant Potential of Curcumin—A Meta-Analysis of Randomized Clinical Trials
Source: PubMed Central journal article supplement (PMC7694612; doi:10.3390/antiox9111092), 2020-11-06
Supplement: antioxidants-09-01092-s001.pdf [file antioxidants-09-01092-s001.pdf]

| Ref                          | POB             |        |    |               |       |    |
|------------------------------|-----------------|--------|----|---------------|-------|----|
|                              | Treatment group |        |    | Control group |       |    |
|                              | mean            | sd     | n  | mean          | sd    | n  |
| Feguri et al., 2017, Brazil  | 353.57          | 355.43 | 14 | 204.64        | 99.78 | 14 |
| Savluk et al., 2017a, Turkey | 837             | 501    | 38 | 785           | 435   | 39 |
