# Supplementary material for: Antioxidant Potential of Curcumin—A Meta-Analysis of Randomized Clinical Trials
Source: PubMed Central journal article supplement (PMC7694612; doi:10.3390/antiox9111092), 2020-11-06
Supplement: antioxidants-09-01092-s002.pdf [file antioxidants-09-01092-s002.pdf]

| Reference                      | Trial duration (days) | Curcumin dose [mg] | Comparator | Malondialdehyde (MDA) baseline |        |       |     |       |       |    |
|--------------------------------|-----------------------|--------------------|------------|--------------------------------|--------|-------|-----|-------|-------|----|
|                                |                       |                    |            | resveratrol                    |        |       | PBO |       |       |    |
|                                |                       |                    |            | unit                           | Ø      | ±     | n   | Ø     | ±     | n  |
| Saraf-Bank/2019/Iran/Academia  | 70                    | 500                | PBO        | µM                             | 143.36 | 81.69 | 30  | 121.4 | 60.13 | 30 |
| Alizadeh/2017/Iran/Academia    | 70                    | 80                 | PBO        | µmol/l                         | 0.96   | 0.09  | 28  | 1.05  | 0.1   | 28 |
| Ghazimoradi/2017/Iran/Academia | 42                    | 1000               | PBO        |                                |        |       |     |       |       |    |
| Nasseri/2017/Iran/Academia     | 84                    | 1000               | PBO        | µmol/l                         | 41.03  | 14.96 | 31  | 38.7  | 12.24 | 30 |

^quartile

| Malondialdehyde (MDA) endopint |       |      |     |        |       |    | Plasma total antioxidant capacity (TAC) |        |       |     |        |       | Plasma total ar |        |        |
|--------------------------------|-------|------|-----|--------|-------|----|-----------------------------------------|--------|-------|-----|--------|-------|-----------------|--------|--------|
| resveratrol                    |       |      | PBO |        |       |    | resveratrol                             |        |       | PBO |        |       | resv            |        |        |
| unit                           | Ø     | ±    | n   | Ø      | ±     | n  | unit                                    | Ø      | ±     | n   | Ø      | ±     | n               | unit   | Ø      |
| µM                             | 73.78 | 51.5 | 30  | 103.23 | 39.55 | 30 | mM                                      | 0.22   | 0.03  | 30  | 0.23   | 0.04  | 30              | mM     | 0.23   |
| µmol/l                         | 0.73  | 0.07 | 28  | 1.08   | 0.1   | 28 | µmol/l                                  | 1.24   | 0.07  | 28  | 1.36   | 0.08  | 28              | µmol/l | 1.95   |
| µmol/l                         | 37.12 | 11.7 | 31  | 39.9   | 12.37 | 30 | µmol/L                                  | 187.09 | 82.26 | 31  | 191.46 | 76.16 | 30              | µmol/L | 207.96 |



| Endpoint      | PBO | Catalase (CAT) baseline |      |      |      |    |     | Catalase (CAT) endpoint |    |      |      |      |    |      |      |    |
|---------------|-----|-------------------------|------|------|------|----|-----|-------------------------|----|------|------|------|----|------|------|----|
|               |     | resveratrol             |      |      | PBO  |    |     | resveratrol             |    |      | PBO  |      |    |      |      |    |
|               | ±   | n                       | unit | Ø    | ±    | n  | Ø   | ±                       | n  | unit | Ø    | ±    | n  | Ø    | ±    | n  |
| 87.89-128.36^ |     | 36                      | µ/mL | 5.68 | 3.95 | 31 | 6.2 | 3.73                    | 30 | µ/mL | 5.81 | 3.76 | 31 | 6.01 | 3.87 | 30 |
